# Supplementary material for: Design of a 3D nanowire-CuO/LDH@FeNi-γAl 2 O 3 catalyst and its synergistic mechanism for accelerated dye degradation in wastewater
Source: Royal Society of Chemistry journal article supplement (doi:10.1039/d5ra06641g), 2026-01-01
Supplement: d5ra06641g1.pdf [file d5ra06641g1.pdf]

*Supporting information*

**Design of a 3D Nanowire-CuO/LDH@FeNi- $\gamma$ -Al<sub>2</sub>O<sub>3</sub> Catalyst and Its Synergistic Mechanism  
for Accelerated Dye Degradation in Wastewater**

Guene L. Razack<sup>a,b,c,d</sup>, Jie Ding<sup>a,b,\*</sup>, Xian Zhao<sup>a,b</sup>, Ya-Ni Zang<sup>a,b</sup>, Chen-Hao Cui<sup>a,b</sup>, Wen-Shuo Wang<sup>a</sup>, Ji-Wei Pang<sup>e</sup>, Lu-Yan Zhang<sup>f</sup>, Worou Chabi Noel<sup>c,d</sup>, Assogba Dou Rached<sup>c,d</sup>, Nan-Qi Ren<sup>a,b</sup>, Shan-Shan Yang<sup>a,b,\*</sup>

<sup>a</sup>*National Engineering Research Center for Safe Disposal and Resources Recovery of Sludge,  
Harbin Institute of Technology, Harbin 150090, China*

<sup>b</sup>*State Key Laboratory of Urban-rural Water Resource and Environment, School of Environment,  
Harbin Institute of Technology, Harbin 150090, China*

<sup>c</sup>*Laboratory of Materials and Structures (LAMS). Graduate School of Civil Engineering  
Véréchaguine, 02 BP 244 Cotonou, Benin*

<sup>d</sup>*Laboratory of Water Science and Technology, National Water Institute (INE), University of  
Abomey-Calavi, 01 BP 526 Cotonou, Benin.*

<sup>e</sup>*Harbin Corner Science & Technology Inc., Harbin 150023, China*

<sup>f</sup>*School of Environmental Science and Engineering, Yancheng Institute of Technology, Yancheng  
224051, China*

*\*Corresponding authors: Shan-Shan Yang, shanshanyang@hit.edu.cn;*

*Jie Ding, dingjie123@hit.edu.cn.*

24 **Test S1. Chemicals and Materials**

25 The copper foam was sourced from [Kunshan Jiayixing Electronic Technology Co., LTD.](#)  $\gamma\text{Al}_2\text{O}_3$   
 26 was obtained from [Shanghai Yaoyi Alloy Material Co., LTD.](#) Sodium Hydroxide (NaOH, 100%),  
 27 and ammonium Persulfate  $(\text{NH}_4)_2\text{S}_2\text{O}_8$ , 99%) were provided by [Tianjin Tianli reagent Co., LTD.](#)  
 28 Nickel nitrate hexahydrate  $(\text{Ni}(\text{NO}_3)_2 \cdot 6\text{H}_2\text{O})$ , 98%) was supplied by [Chemical Reagent Co, LTD.](#)  
 29 Ferrous Sulphate  $(\text{FeSO}_4 \cdot 7\text{H}_2\text{O})$ ,  $\geq 99\%$ ) was acquired from [Tianjin BASF Chemical Co., LTD.](#)  
 30 Additionally, hydrochloric acid (HCl, 33%), acetone, and anhydrous ethanol (EtOH,  $\geq 99.8\%$ ),  
 31 were obtained from [Macklin Reagent Co., LTD.](#) Rhodamine B (RhB) 95% was supplied by  
 32 [MIKA-Aiochemika Reagent Co., LTD.](#), with acid yellow (AY) 36 and methyl blue (MB) provided  
 33 by [Sigma-Aldrich Co., LTD.](#) N, N-dimethylformamide  $(\text{HCON}(\text{CH}_3)_2)$ , 99.5%) from [Tianyang](#)  
 34 [Tianli Chemical Reagent Co., Ltd.](#), Sodium carbonate  $(\text{Na}_2\text{CO}_3)$ , sodium chloride  $(\text{NaCl})$ ,  $\geq 99.5\%$ ),  
 35 [Tianjin Tianli Chemical Reagent Co., Ltd.](#), sodium bicarbonate  $(\text{NaHCO}_3)$ , Sodium nitrate  
 36  $(\text{NaNO}_3)$ , [Tianjin Yongda Chemical Reagent Co., Ltd.](#), chloroform (CF,  $\geq 99.0\%$ ), L-Histidine (L-  
 37 H), and tert-butanol (TBA) were purchased from [Sinopharm Chemical Reagent Co., Ltd.](#)  
 38 [\(Shanghai, China\)](#). Deionized water, used in all experiments, was obtained from a Milli-Q  
 39 academic system. All the chemicals were analytical grade without further purification.

40 **Table S1** Several chemical names and abbreviations

| Chemical                                            | Nam                   | Abbreviation                                  |
|-----------------------------------------------------|-----------------------|-----------------------------------------------|
| $\gamma\text{Al}_2\text{O}_3$                       | Alamina               | $\gamma\text{Al}_2\text{O}_3$                 |
| Fe                                                  | iron                  | F                                             |
| Ni                                                  | Nickel                | N                                             |
| Cu                                                  | Copper                | C                                             |
| O                                                   | Oxygen                | O                                             |
| LDH                                                 | Double-layer hydrogen | L                                             |
| $\gamma\text{Al}_2\text{O}_3\text{xFeNiCu-LDH@CuO}$ | Material              | $\gamma\text{Al}_2\text{O}_3\text{xFNCL@CuO}$ |

41

42

43 **Test S2.** Methods and calculations of the performance removal rate analysis

44 The removal rate of RhB, MB, and AY, noted as  $X_{RhB}$ ,  $X_{MB}$ , and  $X_{AY}$ , was defined according  
45 to Eq. (S1-S3) respectively.

$$46 \quad x_{RhB} = \frac{[RhB]_0 - [RhB]_t}{[RhB]_0} * 100\% \quad (S1)$$

$$47 \quad x_{MB} = \frac{[MB]_0 - [MB]_t}{[MB]_0} * 100\% \quad (S2)$$

$$48 \quad x_{YA} = \frac{[YA]_0 - [AY]_t}{[AY]_0} * 100\% \quad (S3)$$

49 In the context of dye wastewater treatment,  $X_{RhB}$ ,  $X_{MB}$ , and  $X_{AY}$  denote the removal efficiency of  
50 RhB, MB, and AY, respectively. The variables  $[RhB]_0$ ,  $[MB]_0$ , and  $[AY]_0$  represent the initial  
51 concentrations of RhB, MB, and AY in the coking wastewater, whereas  $[RhB]_t$ ,  $[MB]_t$ , and  $[AY]_t$   
52 refer to the residual concentrations of RhB, MB, and AY, respectively, following the 3D particle  
53 electrode treatment. Subsequently, the residual concentration of Rhodamine B, methyl blue, and  
54 yellow acid in the solution was determined using a TU-1901 UV-vis spectrophotometer at a  
55 wavelength of 550 nm, 650 nm, and 435 nm through colorimetric analysis. The values of  $UV_{550}$ ,  
56  $UV_{650}$ , and  $UV_{435}$  were determined using the following equations: S(4-6):

$$57 \quad RhB:UV_{570} = \frac{A}{b} * C \quad (S4)$$

$$58 \quad MB:UV_{600} = \frac{A}{b} * C \quad (S5)$$

$$59 \quad YA:UV_{435} = \frac{A}{b} * C \quad (S6)$$

60 In this equation,  $C_t$  (mg/L) denotes the RhB, MB, or AY concentration of the dye wastewater at a  
61 given time,  $t$ .  $C_0$  (mg L<sup>-1</sup>) represents the initial concentration of RhB, MB, or AY in the dye  
62 wastewater. The parameter  $k$  is the pseudo-first-order rate constant, expressed in minutes per min  
63 Eq. (S7):

$$\ln C_t = -kt + \ln C_0 \quad (S7)$$

65 where  $C_t$  (mg/L) is the RhB, MB, or AY concentration of the dye wastewater at time  $t$ ;  $C_0$  (mg L<sup>-1</sup>)  
66 is the RhB, MB, or AY concentration of the dye wastewater at the initial time; and  $k$  is the  
67 pseudo-first-order rate constant (min<sup>-1</sup>).

68

### 69 **Test S3. CV and EIS electrocatalysts test sample preparation**

70 The electrode materials are evaluated for their electrochemical properties using the CHI760E  
71 electrochemical working station. In the course of each electrochemical evaluation, encompassing  
72 both cyclic voltammetry (CV) and electrochemical impedance spectroscopy (EIS), the electrolyte,  
73 counter electrode, and reference electrode were consistently established as 5 M KOH aqueous  
74 solution, Pt wire, and Hg/HgO electrode, respectively. The substance contained within the  
75 electrode system has a loading mass of approximately 7 mg. The utilized electrolyte was 5 M  
76 KOH.

77 The three-electrode system is utilized in the test. The reference electrode employed is Hg/HgO,  
78 and the counter electrode is platinum.

79 The EIS test was conducted within the frequency range of 100 kHz to 0.1 Hz, with an amplitude  
80 ranging from 10 to 40 mV.

81

### 82 **Test S4. EIS electroanalytical methods**

According to Uygun et al.<sup>1</sup>, the electron-injection system (EIS) circuit and the redox reaction occur at the surface of the working electrodes in a conventional electrochemical cell, otherwise known as a three-electrode system.  $R_{ct}$  is an abbreviation for "charge transfer resistance,"  $R_s$  is an abbreviation for "electrolyte resistance," and  $C_{dl}$  is an abbreviation for "capacitance double layer."

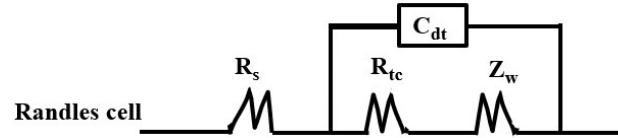

**Fig. S1.** The scheme is described as straightforward of the EIS circuit and the redox reaction that occurs at the surface of working electrodes in a traditional electrochemical cell.

Equation S8 quantifies the correlation between the applied frequency ( $f$ ) and the radial frequency ( $\omega$ ).

$$\omega = 2 \cdot \pi \cdot f \quad (S8)$$

In a linear system, the signal undergoes a phase shift ( $\Phi$ ) and exhibits a variation in amplitude relative to  $I_0$  (Equation S9).

$$I_t = I_0 \sin(\omega t + \Phi) \quad (S9)$$

Therefore, as indicated by Equation S10, the impedance of the entire system can be calculated.

Substituting  $z$  for  $E$  and  $I$ , we obtain the following equation:

$$z = \frac{E}{I} = z_0 \exp i\Phi = z_0(\cos \Phi + i \sin \Phi) \quad (S10)$$

The variables  $Z$ ,  $E$ ,  $I$ ,  $\omega$ , and  $\Phi$  represent impedance, potential, current, frequency, and phase shifts, respectively, between  $E$  and  $I$ .

104

#### 105 **Test S5. Quenching information**

106 The quenching experiment is analogous to the oxidation experiment of RhB, with the salient  
107 difference being the simultaneous addition of quenching, an anion molecule, and an organic  
108 compound. This method has been employed by Jinxiang et al.<sup>2</sup>. Quenching experiments were  
109 performed with the addition of  $\text{NO}_3^-$ ,  $\text{Cl}^-$ ,  $\text{HCO}_3^-/\text{CO}_3^{2-}$ , and TBA, which were employed as  
110 scavengers for nitrate radicals ( $\text{NO}_3^\cdot$ ), chlorine radical ( $\text{Cl}^\cdot$ ), carbonate radical ( $\text{CO}_3^{2\cdot}$ ), and organic  
111 TBA, respectively. The quenching experiment was conducted at room temperature in 250-mL  
112 clear glass beakers, with the stirring rate maintained at a constant level. Subsequently, 150 mg/L  
113 of  $\gamma\text{Al}_2\text{O}_3\text{xFNCL}_{20}\text{@CuO-400}$  catalysts were added to a solution containing 20 mg/ L RhB, and  
114 the mixture was stirred. The pH value of the solutions was then adjusted to 8.0. The initiation of  
115 the reaction was facilitated by the incorporation of 0.25, 0.50, 1, and 2 mM quenchers, along with  
116 12 V, within a 3D system. Samples were collected and quenched after reacting for a specific time.  
117 Subsequently, the solution was filtered with a 0.22-micrometer membrane to remove the catalysts  
118 before analysis.

119

120

121

122

123

124

125

126 **2. Removal efficiency of the RhB, MB, and AY using the different catalysts**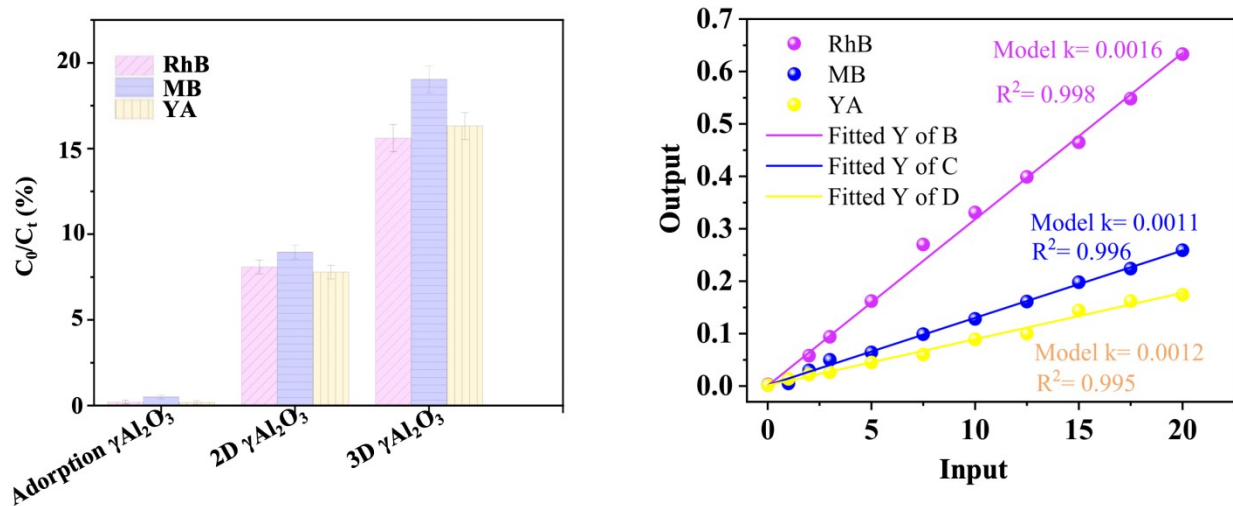

127

128 **Fig. S2.** Performance removal of RhB, MB, and AY using  $\gamma\text{Al}_2\text{O}_3$  catalytic, initial condition: 20  
 129  $\text{mg L}^{-1}$  of RhB, MB, and YA, 12V, at lab temperature.

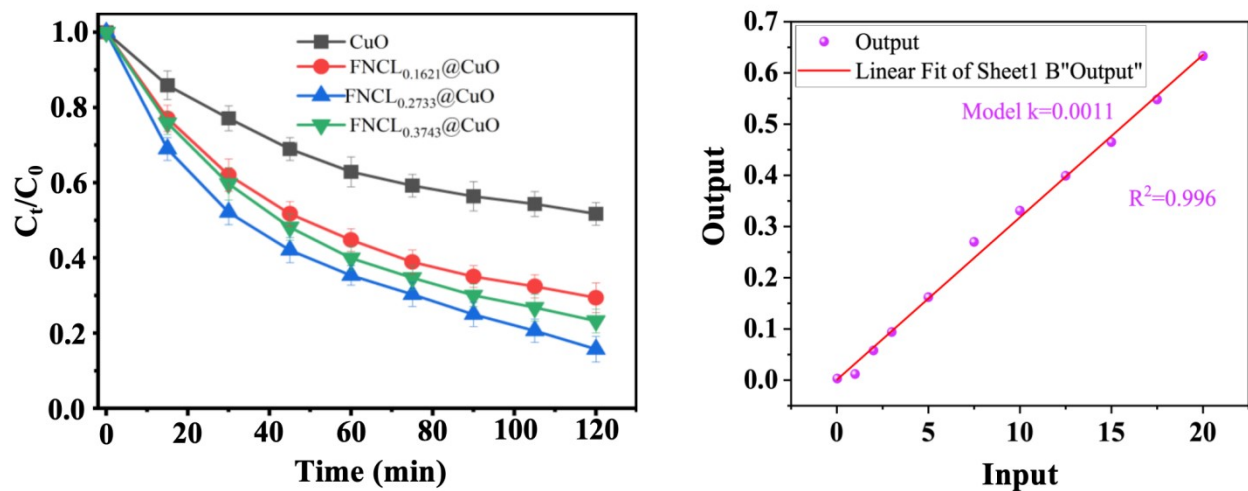

130

131 **Fig. S3.** performance of the different catalytic FeNiCu-LDH@CuO-0.1621, FNCL@CuO-  
 132 0.2733, and FNCL@CuO-0.3742 using a 3D electrode to remove RhB, MB, and AY, initial  
 133 condition: 20  $\text{mg L}^{-1}$  of RhB, 12V, at lab temperature.

134

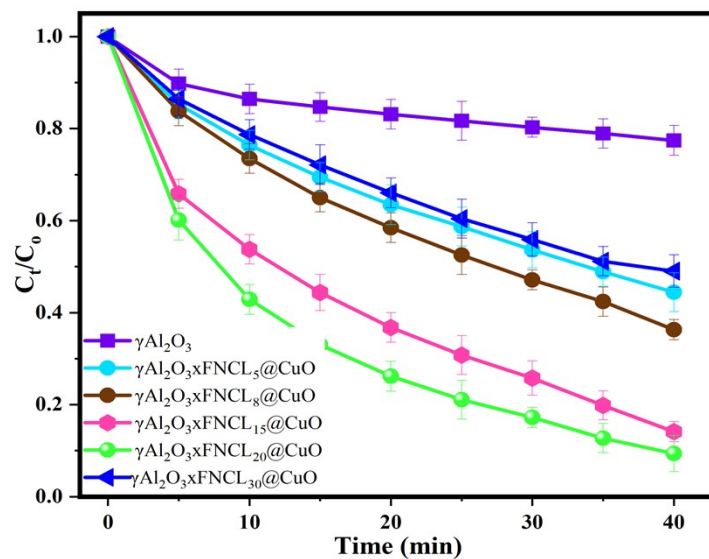

135

136 **Fig. S4.** The removal performance of the different concentrations  $\gamma\text{Al}_2\text{O}_3\text{xFNCL@CuO}$ , initial  
 137 condition: 20 mg L<sup>-1</sup> of RhB, 12 V, at lab temperature

138

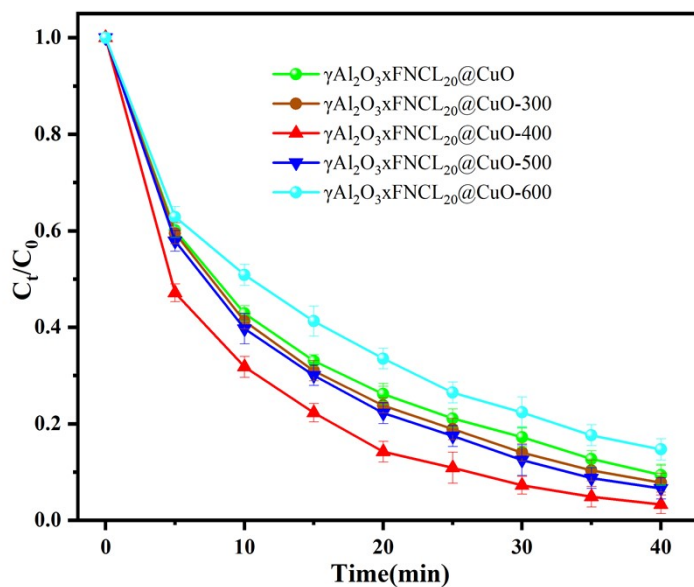

139



140 **Fig. S5.** The calcination removal performance of RhB from wastewater using the 3D system,  
 141 initial condition: 20 mg L<sup>-1</sup> of RhB, 12 V, at lab temperature

142 **Table S2** The performance removal of the catalysts in the 3D system.

| Materials                                                     | system                                | Removal rate (%) |       |       |
|---------------------------------------------------------------|---------------------------------------|------------------|-------|-------|
|                                                               |                                       | RhB              | MB    | AY    |
| $\gamma\text{Al}_2\text{O}_3$                                 | Adsorption                            | 8.08             | 8.95  | 7.78  |
|                                                               | Without $\gamma\text{Al}_2\text{O}_3$ | 10.53            | 12.82 | 10.62 |
|                                                               | 3D                                    | 15.6             | 19.03 | 16.3  |
| FNCL <sub>0.1621</sub> @CuO                                   | 3D                                    | 70.6             | -     | -     |
| FNCL <sub>0.2733</sub> @CuO                                   | 3D                                    | 84.27            | -     | -     |
| FNCL <sub>0.3742</sub> @CuO                                   | 3D                                    | 76.8             | -     | -     |
| $\gamma\text{Al}_2\text{O}_3\text{xFNCL}_5\text{@CuO}$        | 3D                                    | 55.55            | -     | -     |
| $\gamma\text{Al}_2\text{O}_3\text{xFNCL}_8\text{@CuO}$        | 3D                                    | 63.7             | -     | -     |
| $\gamma\text{Al}_2\text{O}_3\text{xFNCL}_{15}\text{@CuO}$     | 3D                                    | 85.85            | -     | -     |
| $\gamma\text{Al}_2\text{O}_3\text{xFNCL}_{20}\text{@CuO}$     | 3D                                    | 90.6             | -     | -     |
| $\gamma\text{Al}_2\text{O}_3\text{xFNCL}_{30}\text{@CuO}$     | 3D                                    | 50.96            | -     | -     |
| $\gamma\text{Al}_2\text{O}_3\text{xFNCL}_{20}\text{@CuO-300}$ | 3D                                    | 79.52            | -     | -     |
| $\gamma\text{Al}_2\text{O}_3\text{xFNCL}_{20}\text{@CuO-400}$ | 3D                                    | 96.69            | -     | -     |
| $\gamma\text{Al}_2\text{O}_3\text{xFNCL}_{20}\text{@CuO-500}$ | 3D                                    | 88.38            | -     | -     |
| $\gamma\text{Al}_2\text{O}_3\text{xFNCL}_{20}\text{@CuO-600}$ | 3D                                    | 85.30            | -     | -     |

143

### 144 3. Characterization of the new particle electrode synthesized

145 **Table S3** Physical parameters of catalysts

| Catalysts                                         | Al (At. %) | O (At. %) | Fe (At. %)        | Ni (At. %)        | Cu (At. %)        |
|---------------------------------------------------|------------|-----------|-------------------|-------------------|-------------------|
| $\gamma\text{Al}_2\text{O}_3$                     | 56         | 64        | N. A <sup>a</sup> | N. A <sup>a</sup> | N. A <sup>a</sup> |
| FNCL <sub>20</sub> @CuO                           | N. A       | 16.3      | 38.5              | 27.5              | 18.7              |
| $\gamma\text{Al}_2\text{O}_3\text{xFNCL}@CuO-400$ | 41.8       | 47.2      | 5.9               | 2.8               | 2.3               |

146 Note: <sup>a</sup> Not addicted

147 **Table S4** Physical parameters and lattice parameters of catalysts

| Catalysts | Pore volume (cm <sup>3</sup> .g <sup>-1</sup> ) | S <sub>BET</sub> (m <sup>2</sup> .g <sup>-1</sup> ) | Average pore diameter (nm) | Lattice parameters |
|-----------|-------------------------------------------------|-----------------------------------------------------|----------------------------|--------------------|
|-----------|-------------------------------------------------|-----------------------------------------------------|----------------------------|--------------------|

|                                                   |      |     |      | (%) |
|---------------------------------------------------|------|-----|------|-----|
| $\gamma\text{Al}_2\text{O}_3$                     | 0.11 | 15  | 12.4 | 8.5 |
| $\gamma\text{Al}_2\text{O}_3\text{xFNCL@CuO-400}$ | 0.99 | 127 | 7.8  | 8.2 |

148

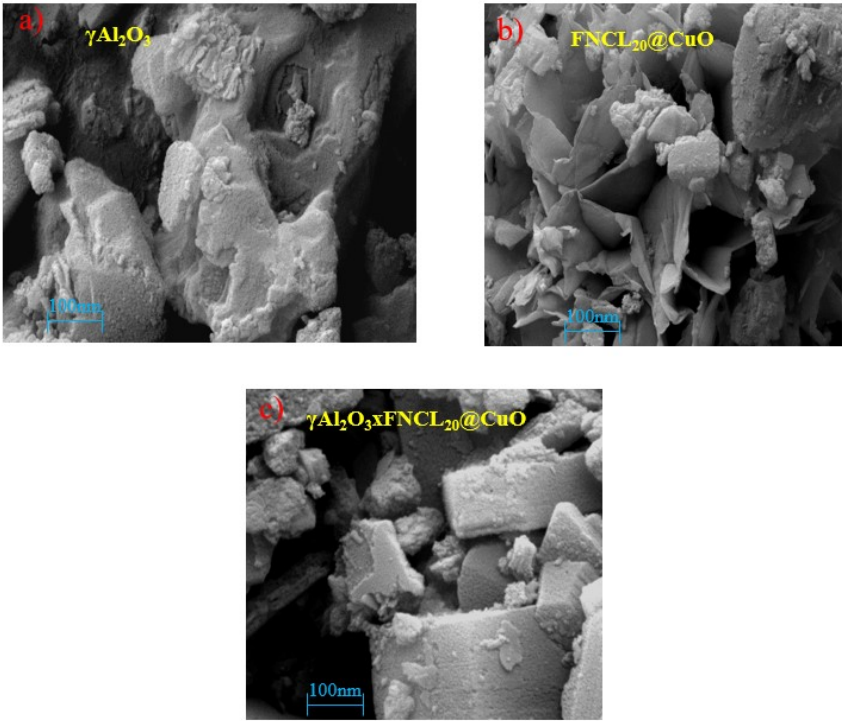

149

150

151

**Fig. S6.** Scanning electron microscope (SEM) images at 100 nm of the a)  $\gamma\text{Al}_2\text{O}_3$ : b) FNCL@CuO, c)  $\gamma\text{Al}_2\text{O}_3\text{xFNCL}_{20}\text{@CuO}$ .

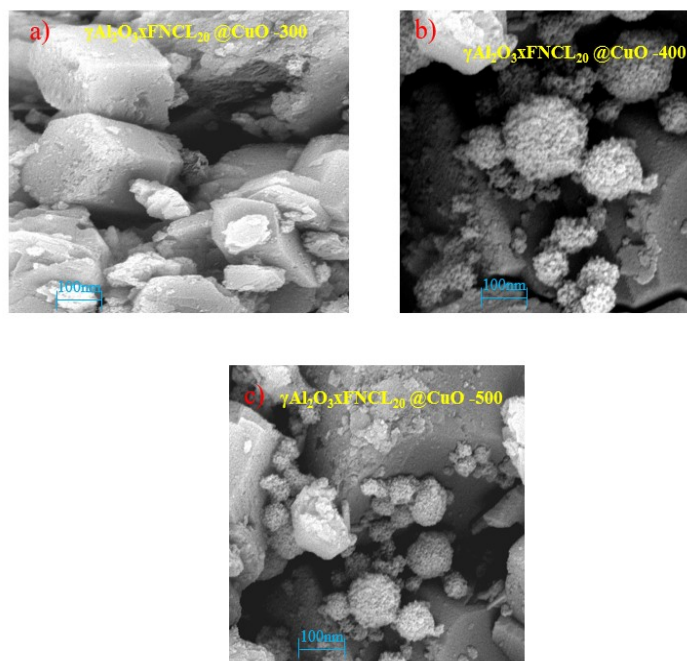

**Fig. S7.** Scanning electron microscope (SEM) images at 100 nm of the different calcination: a)  $\gamma\text{Al}_2\text{O}_3\text{xFNCL}_{20}\text{@CuO-300}$ , b)  $\gamma\text{Al}_2\text{O}_3\text{xFNCL}_{20}\text{@CuO-400}$ , c)  $\gamma\text{Al}_2\text{O}_3\text{xFNCL}_{20}\text{@CuO-500}$ .

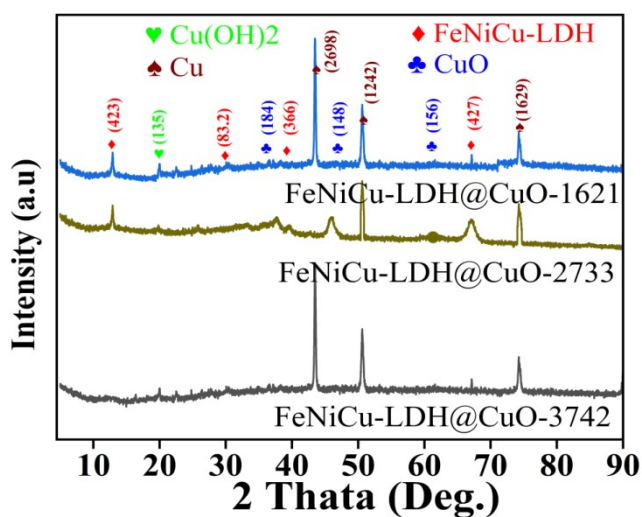

**Fig. S8.** XRD of the FeNiCu-LDH@CuO particle electrode

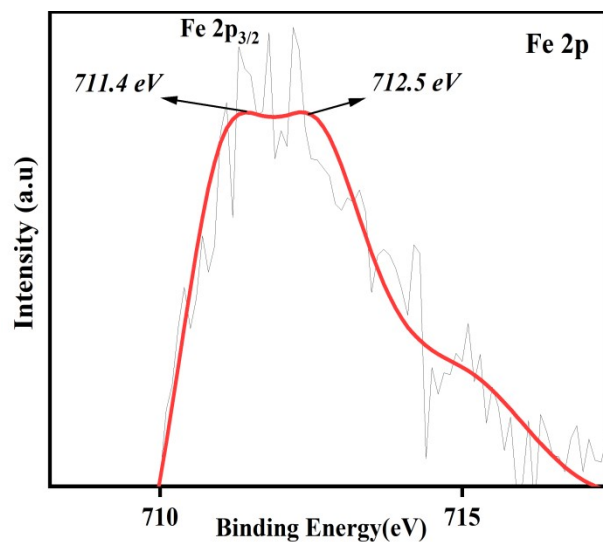

**Fig. S9.** Characterization XPS (Fe 2p) of the particle electrode  $\gamma\text{Al}_2\text{O}_3\text{xFNCL}_{20}\text{@CuO-400}$

#### 4. Mechanism of the degradation of organic pollutants from wastewater

**Table S5** A summary of the removal efficiency of the metal- $\text{Al}_2\text{O}_3$  electrode reported in the preview literature and obtained in this study.

| Catalyst                                        | Electrode                                     | Pollutant        | Condition                                                                              | Removal efficient | Reference  |
|-------------------------------------------------|-----------------------------------------------|------------------|----------------------------------------------------------------------------------------|-------------------|------------|
| $\gamma\text{Al}_2\text{O}_3\text{xFNCL@CuO}$   | A: Pt <sup>c</sup><br>C: Pt                   | RhB <sup>a</sup> | J: 12 V;<br>Catalyst: 150 mg L <sup>-1</sup> ;                                         | 98.82%,           | This study |
|                                                 |                                               | MB <sup>b</sup>  | Co: 20 mg L <sup>-1</sup> ;<br>RhB pH: 8; MB                                           | 99.99%,           |            |
|                                                 |                                               | YA <sup>c</sup>  | and YA pH: 5;<br>Time: 40 min;<br>T: 25 °C                                             | 98.97%.           |            |
| $\text{CuFe}_2\text{O}_4/\text{Al}_2\text{O}_3$ | A: Ti/RuO <sub>2</sub><br>C: stain-less-steel | p-nitrophenol    | 24 mA cm <sup>-2</sup> ;<br>CFO/PEs<br>dosage: 0.3 kg L <sup>-1</sup> ;<br>Conditions: | 80.23%            | 3          |

|                                                    |                                                                                                |                      |                                                                                    |       |   |
|----------------------------------------------------|------------------------------------------------------------------------------------------------|----------------------|------------------------------------------------------------------------------------|-------|---|
|                                                    |                                                                                                |                      | [PNP] = 150 mg L <sup>-1</sup> ;<br>pH: 4.95;<br>T: 30 min                         |       |   |
|                                                    | -----                                                                                          | tetracycline         | I: 0.1 A;                                                                          | 86%   |   |
|                                                    | -----                                                                                          |                      | Co: 100 mg L <sup>-1</sup> ;<br>Particle dosage: 15 g;<br>pH: 5.9;<br>time 180 min |       | 4 |
| Bi-Sn-Sb/ $\gamma$ -Al <sub>2</sub> O <sub>3</sub> |                                                                                                |                      |                                                                                    |       |   |
|                                                    | A: RuO <sub>2</sub> -<br>IrO <sub>2</sub> /Ti<br>C: RuO <sub>2</sub> -<br>IrO <sub>2</sub> /Ti | ciprofloxacin        | I: 0.2 A;<br>PEs: 15 g;<br>Co: 100 mg L <sup>-1</sup> ;<br>pH: 6;<br>T: 40 min     | 52.6% | 5 |
| Co-Ce-Zr/ $\gamma$ -Al <sub>2</sub> O <sub>3</sub> |                                                                                                |                      |                                                                                    |       |   |
|                                                    | ....                                                                                           | Oxytetracycline      | I: 0.5 mA.cm <sup>-2</sup> ;                                                       | 92.0% |   |
|                                                    | .....                                                                                          | total organic carbon | PEs: 20 g;<br>Co: 100 mg L <sup>-1</sup> ;<br>pH: 6;<br>T: 120 min                 | 41%   | 4 |
| Ti-Sn-Sb/ $\gamma$ -Al <sub>2</sub> O <sub>3</sub> |                                                                                                |                      |                                                                                    |       |   |

166 **Noted:** <sup>a</sup> Rhodamine B; <sup>b</sup> Methyl blue; <sup>c</sup> yellow acid; <sup>d</sup> Chemical organic demand; <sup>e</sup> Platinum

167

168 **Table S6** Degradation power of RhB

| Name   | Number of bonds | Estimated dipole moment | Molecular Formula                                               | Molecular weight m/z | Proposed structure                                                                    |
|--------|-----------------|-------------------------|-----------------------------------------------------------------|----------------------|---------------------------------------------------------------------------------------|
| RhB/P1 | 36              | 3.128                   | C <sub>28</sub> H <sub>32</sub> ClN <sub>2</sub> O <sub>3</sub> | 443                  | 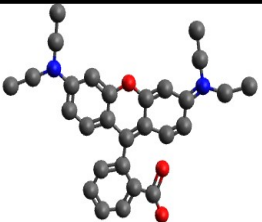 |
| P2     | 35              | 5.849                   | C <sub>26</sub> H <sub>33</sub> N <sub>2</sub> O <sub>3</sub>   | 413                  |  |

|    |    |       |                    |                |                                                                                      |
|----|----|-------|--------------------|----------------|--------------------------------------------------------------------------------------|
| P3 | 31 | 4.403 | $C_{24}H_{25}NO_3$ | 297            | 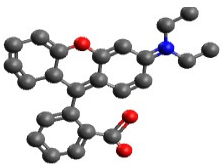  |
| P4 | 29 | 5.580 | $C_{22}H_{21}NO_3$ | 327            |   |
| P5 | 12 | 4.201 | $C_8H_{10}O_4$     | 167            |   |
| P6 | 9  | 1.954 | $C_6H_{12}O_3$     | 132            |   |
| P7 | 8  | 2.029 | $C_6H_{10}O_2$     | 114            |  |
| P8 |    |       | $CO_2 + H_2O$      | Mineralization |   |

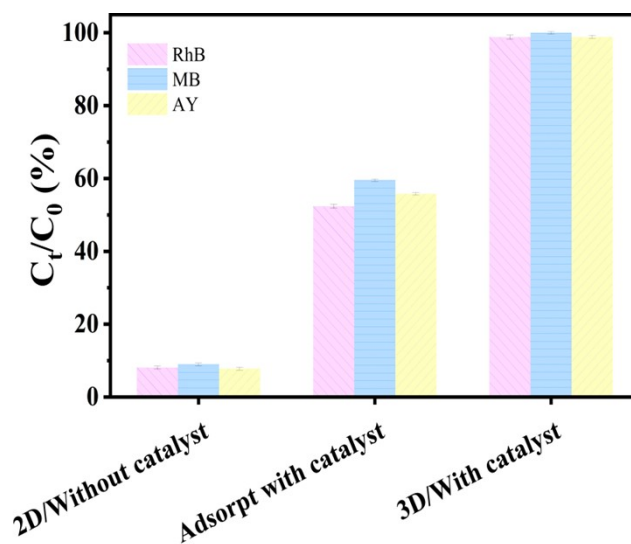

**Fig. S10** 2D and 3D comparison of the performance in the removal of RhB, MB, and AY with the catalyst  $\gamma\text{Al}_2\text{O}_3\text{xFNL}_{20}\text{@CuO-400}$ , initial condition: 150 mg L<sup>-1</sup>, [catalytic]<sub>0</sub>, 20 mg L<sup>-1</sup> of [RhB]<sub>0</sub>=[MB]<sub>0</sub>=[YA]<sub>0</sub>, 12 V, at lab temperature.

**Test S6** the difference in system performance

The variation system performance is illustrated in Figure S10, which is based on the comparative results of different systems, adsorption, 2D, and 3D. According to a previous study, the production of  $\cdot\text{OH}$  was investigated during the 2D and 3D electrolysis through the RhB degradation. As demonstrated in Section 3.4, Figure 4, a greater number of hydroxyl radicals were produced after 40 minutes in the 3D electrolysis system compared to the 2D system. It has been demonstrated that each particle electrode has the capacity to operate as a micro-electrolytic cell under electrostatic induction, thereby generating an increased number of hydroxyl radicals through water electrolysis in 3D electrolysis<sup>6</sup>. Consequently, the incorporation of suitable particle electrodes within the 3D electrolysis system has been demonstrated to enhance the capacity of indirect

195 oxidation through the generation of  $\cdot\text{OH}$ , thereby augmenting the removal efficiency of  
 196 pollutants<sup>7</sup>.

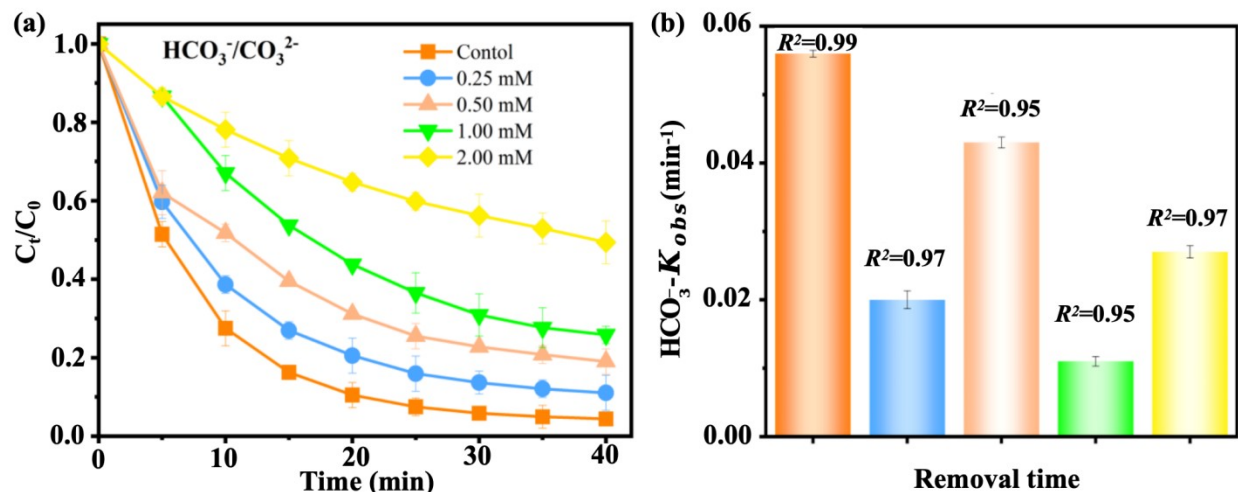

197

198 **Fig. S11.** (a) Effect of  $\text{HCO}_3^{2-}/\text{CO}_3^{2-}$  and the  $k_{obs}$ . (b) Durant RhB degradation using the 3D

199 system. Conditions:  $[\text{Catalyst}]_0 = 150 \text{ mg L}^{-1}$ ,  $[\text{RhB}]_0 = 20 \text{ mg L}^{-1}$ ,  $\text{pH} = 8$ , and 12 V.

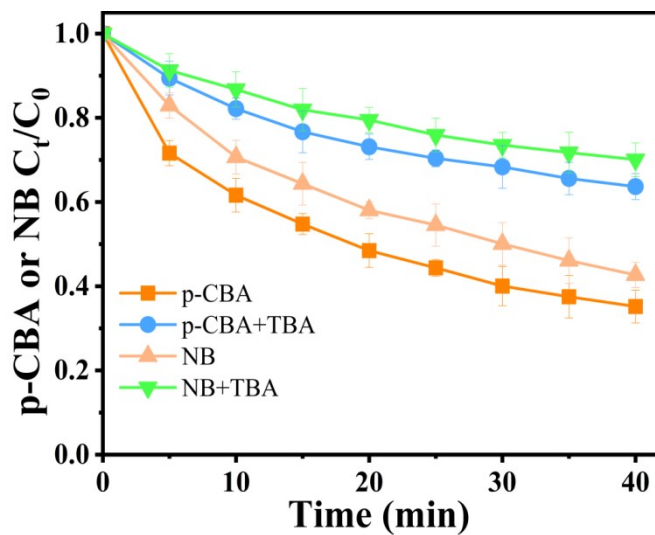

200

201 **Fig. S12** Oxidation of p-CBA and NB in the 3D electrode reaction without and with the addition

202 of TBA. Conditions:  $[\text{Catalyst}]_0 = 150 \text{ mg L}^{-1}$ ,  $U = 12\text{V}$ ,  $[\text{contaminants}]_0 = 20 \mu\text{M}$ ,  $[\text{pH}]_0 = 7$ ,  $T =$

203  $25^\circ\text{C}$  applied  $[\text{TBA}]_0 = 100 \text{ mM}$ .



205 **References**

- 206 1 Uygun HDE, Uygun ZO. Electrochemical Impedance Spectroscopy (EIS) Principles and  
207 Biosensing Applications. *Handb Nanobioelectrochemistry Appl Devices Biomol Sens.*  
208 2021;(2021):919–39.
- 209 2 Zuo J, Fu D, Yan P, Wang S, Li Y, Shen L, et al. Synergistic mechanism of surface oxygen  
210 vacancies and metal sites on Al-substituted  $\text{NiFe}_2\text{O}_4$  during peroxymonosulfate activation  
211 in the solid-water interface for 2,4-D degradation. *Chem Eng J.* 2024, 480, 147884.  
212 [//doi.org/10.1016/j.cej.2023.147884](https://doi.org/10.1016/j.cej.2023.147884)
- 213 3 Wu X, Song X, Chen H, Yu J. Treatment of phenolic compound wastewater using  
214  $\text{CuFe}_2\text{O}_4/\text{Al}_2\text{O}_3$  particle electrodes in a three-dimensional electrochemical oxidation  
215 system. *Environ Technol (United Kingdom).* 2021, 42, 393–404.  
216 <https://doi.org/10.1080/09593330.2020.1760356>
- 217 4 Sun W, Sun Y, Shah KJ, Chiang PC, Zheng H. Electrocatalytic oxidation of tetracycline by  
218  $\text{Bi-Sn-Sb}/\gamma\text{-Al}_2\text{O}_3$  three-dimensional particle electrode. *J Hazard Mater.* 2019, 370, 24–32.  
219 <https://doi.org/10.1016/j.jhazmat.2018.09.085>
- 220 5 Yaxin Liu, Yongwen Ma, Jinqun Wan, Yan Wang, Jian Sun YX. Electrocatalytic oxidation  
221 of ciprofloxacin by  $\text{Co-Ce-Zr}/\gamma\text{-Al}_2\text{O}_3$  three-dimensional particle electrode. *Environ Sci*  
222 *Pollut Res.* 2021, 28, 43815–43830. <https://doi.org/10.1007/s11356-021-13547-9>
- 223 6 Chao Zhang, Yonghai Jiang, Yunlin Li, Zhongxin Hu, Lei Zhou, Minghua Zhou. Three-  
224 dimensional electrochemical process for wastewater treatment: A general review. *Chemical*

225        Engineering Journal, 2013, 228, 455-467. <http://dx.doi.org/10.1016/j.cej.2013.05.033>

226    7        Pengxiao Liu, Xu Wang, Jing Lu, Ying Li, Bin Hou, Ling Feng. Removal of antipyrine  
227        through two-dimensional and three-dimensional electrolysis: comparison, modification,  
228        and improvement. Environmental Science and Pollution Research, 2020, 27, 40837-40847.  
229        <http://dx.doi.org/10.1007/s11356-020-09763-4>

230

231
